# Supplementary material for: Nickel–copper bimetal organic framework nanosheets as a highly efficient catalyst for oxygen evolution reaction in alkaline media
Source: Royal Society of Chemistry journal article supplement (doi:10.1039/c8nj01035h), 2018-01-01
Supplement: c8nj01035h1.pdf [file c8nj01035h1.pdf]

## Electronic Supplementary Information

### Experimental Section

**Materials:** Copper nitrate trihydrate, 1,4-benzenedicarboxylic acid (TPA), N,N-dimethylformamide (DMF) were purchased from Aladdin Ltd. (Shanghai, China).  $\text{RuCl}_3 \cdot 3\text{H}_2\text{O}$  ( $\geq 43\%$ ) were bought from Sigma-Aldrich Chemical Reagent Co., Ltd. Nickel foam (NF) was supplied by Changsha Liyuan New Material Ltd, which was washed with acetone, hydrochloric acid (3 mol/L), ethanol and deionized water several times to remove the surface impurities. Ultrapure water (18.2 M $\Omega$ .cm) was utilized to prepare all solutions. All reagents were used as received without further purification.

### Preparation of NiCu-MOFNs/NF

Ni-Cu MOFNs was grown on the Ni foam through one-pot hydrothermal synthesis: copper nitrate trihydrate 1 mmol (0.242 g) and 1,4-benzenedicarboxylic acid 1mmol (0.166g) were dissolved in 35 mL DMF under constant stirring for 30 min. The final solution and the pre-treated Ni foam (2cm \*3cm) were sealed in a 40 mL Teflon-lined stainless-steel autoclave and maintained at 110 °C for 36 h, followed by slow cooling to room temperature. The product was washed for three times with DMF, deionized water and ethanol successively. Dried under 60 °C in air for 4 hours.

### Synthesis of RuO<sub>2</sub>

RuO<sub>2</sub> was prepared according to previous publication. Briefly, 1.5 g of  $\text{RuCl}_3 \cdot 3\text{H}_2\text{O}$  was added into 50 mL distilled water and stirred for ten minutes. Then 15.0 mL KOH (1.0 M) was added and stirred for 45 min at 100 °C. The above solution was centrifuged for 10 minutes and filtered. The precipitates were collected and washed with pure water several times. Finally, the product was dried at 80 °C overnight and then annealed at 300 °C in air atmosphere for 3 h. For a typical synthesis of RuO<sub>2</sub>/NF electrode, 50 mg RuO<sub>2</sub> was dispersed in 1 mL ethane/water (v:v = 1:1) solution with sonication for 30 min. Then 21  $\mu\text{L}$  catalytic inks were dropped on Ni foam (0.5 × 0.5 cm), and dried at 80 °C for 4 h. The loading for RuO<sub>2</sub>/NF was about 4.2 mg cm<sup>-2</sup>.

## Characterizations

X-ray diffraction (XRD) measurements were using a RigakuD/MAX 2550 diffractometer with Cu K $\alpha$  radiation ( $\lambda=1.5418 \text{ \AA}$ ). Samples were analyzed over a range of 5–80° using a step scan mode with a step rate of 4°/min. SEM measurements were carried out on a MERLIN Compact scanning electron microscope at an accelerating voltage of 20 kV. TEM images were collected on a Zeiss Libra 200FE transmission electron microscope operated at 200 kV. XPS measurements were performed using an ESCALABMK II X-ray photoelectron spectrometer with the exciting source of Mg. FT-IR measurement was carried out on Nicolet Nexus 410 spectrometer. ICP-OES was performed using an Agilent Icpoes730 spectrometer.

## Electrochemical measurements

All the electrochemical measurements are performed with a CHI 660E electrochemical analyzer (CH Instruments, Inc., Shanghai) at room temperature in a conventional three electrode system, using NiCu-MOFNs/NF as working electrode, graphite rod as counter electrode and mercuric oxide electrode (Hg-HgO) electrode as reference electrode. All tests were carried out at room temperature (25 °C)

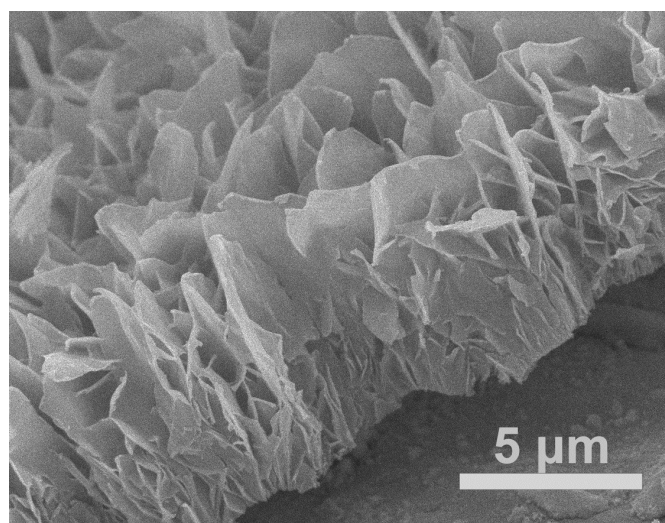

**Fig. S1.** SEM pattern of NiCu-MOFNs/NF

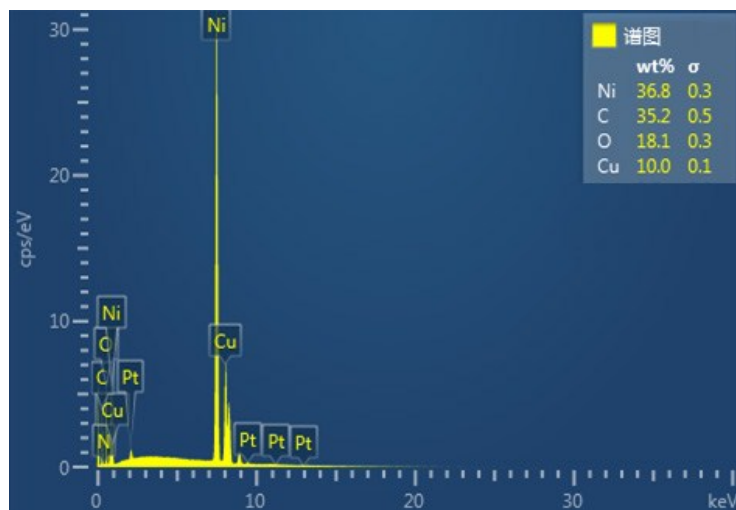

Fig. S2. EDX spectrum of NiCu-MOFNs.

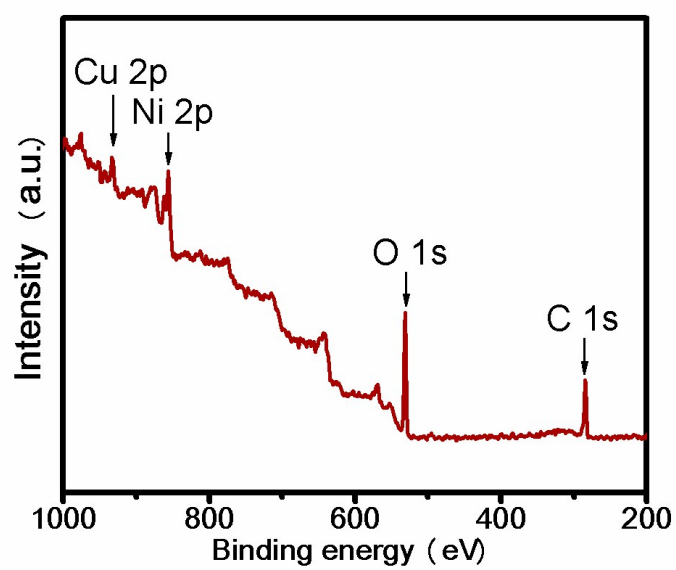

Fig. S3. XPS spectra of NiCu-MOFNs

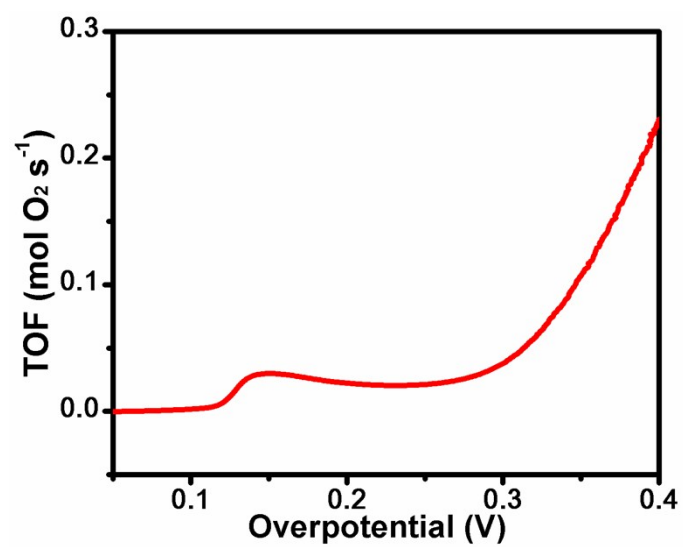

**Fig. S4.** Plot of TOF for NiCu-MOFNs/NF

**Table S1:** ICP-OES data for NiCu-MOFNs powder scratched from NiCu-MOFNs/NF

| Mass of sample/g | Volume/ml | Metal | Concentration in solution (mg/L) | Concentration (mg/g) | Concentration (mol/g) |
|------------------|-----------|-------|----------------------------------|----------------------|-----------------------|
| 0.0138           | 250       | Ni    | 13.54                            | 245.29               | 0.00418               |
|                  |           | Cu    | 3.471                            | 62.88                | 0.00099               |

**Table S2.** Comparison of OER performance for NiCu-MOFNs/NF with other non-noble-metal electrocatalysts in alkaline media.

| Catalyst                                                                | $j$ (mA cm <sup>-2</sup> ) | $\eta$ (mV) | Electrolyte                         | Ref.      |
|-------------------------------------------------------------------------|----------------------------|-------------|-------------------------------------|-----------|
| NiCu-MOF/NF                                                             | 100                        | 309         | 1.0M KOH                            | This work |
| NiFe-MOF/NF                                                             | 10                         | 240         | 1.0M KOH                            | 1         |
| NiCo-MOF/CF                                                             | 10                         | 189         | 1.0M KOH                            | 2         |
| (GO 8 wt%) Cu-MOF/GC                                                    | 2                          | 110         | 0.5M H <sub>2</sub> SO <sub>4</sub> | 3         |
| NiS/Ni foam                                                             | 100                        | 350         | 1.0 M KOH                           | 4         |
| Ni-P/Ni                                                                 | 100                        | 374         | 1.0 M KOH                           | 5         |
| Zn <sub>x</sub> Co <sub>3-x</sub> O <sub>4</sub> nanowire array         | 50                         | 390         | 1.0 M KOH                           | 6         |
| NiFe LDH/NF                                                             | 100                        | 390         | 1.0 M KOH                           | 7         |
| Ni <sub>3</sub> Se <sub>2</sub> /Cu foam                                | 100                        | 388         | 1.0 M KOH                           | 8         |
| NiFe/NF                                                                 | 20                         | 264         | 1.0 M KOH                           | 9         |
| Cu <sub>3</sub> P@NF                                                    | 10                         | 320         | 1.0 M KOH                           | 10        |
| Co <sub>3</sub> O <sub>4</sub> /NiCo <sub>2</sub> O <sub>4</sub>        | 10                         | 340         | 1.0 M KOH                           | 11        |
| NiCo-NS                                                                 | 10                         | 334         | 1.0 M KOH                           | 12        |
| CeO <sub>2</sub> /CoSe <sub>2</sub>                                     | 10                         | 288         | 0.1 M KOH                           | 13        |
| Al-CoP/CC                                                               | 10                         | 265         | 1.0 M KOH                           | 14        |
| Cu/(Cu(OH) <sub>2</sub> -CuO) NA/CF                                     | 10                         | 390         | 1.0 M KOH                           | 15        |
| carbonate-Co(OH) <sub>2</sub> /NF                                       | 50                         | 337         | 1.0 M KOH                           | 16        |
| Fe-CoP/CC Fe-CoP/CC                                                     | 10                         | 340         | 1.0 M KOH                           | 17        |
| Ni <sub>3</sub> Se <sub>2</sub> /CF Ni <sub>3</sub> Se <sub>2</sub> /CF | 10                         | 420         | 1.0 M KOH                           | 18        |
| Co <sub>3</sub> O <sub>4</sub> /N -rmGO                                 | 10                         | 310         | 1.0 M KOH                           | 19        |
| Co <sub>3</sub> O <sub>4</sub> @C-MWCNTs                                | 10                         | 320         | 1.0 M KOH                           | 20        |

## Reference

- 1 J. Duan, S. Chen and C. Zhao, *Nat. Commun.*, 2017, **8**, 15341.
- 2 S. Zhao, Y. Wang, J. Dong, C. -T. He, H. Yin, P. An, K. Zhao, X. Zhang, C. Gao, L. Zhang, J. Lv, J. Wang, J. Zhang, A. M. Khattak, N. A. Khan, Z. Wei, J. Zhang, S. Liu, H. Zhao and Z. Tang, *Nature Energy*, 2016, **1**, 16184
3. M. Jahan, Z. Liu and K. P. Loh, *Adv. Funct. Mater.*, 2013, **23**, 5363–5372
4. W. Zhu, X. Yue, W. Zhang, S. Yu, Y. Zhang, J. Wang and J. Wang, *Chem. Commun.*, 2016, **52**, 1486–1489.
5. C. Tang, A. M. Asiri, Y. Luo and X. Sun, *ChemNanoMat.*, 2015, **1**, 558–561.
6. X. Liu, Z. Chang, L. Luo, T. Xu, X. Lei, J. Liu and X. Sun, *Chem. Mater.*, 2014, **26**, 1889–1895.
7. J. Luo, J. H. Im, M. T. Mayer, M. Schreier, M. K. Nazeeruddin, N. G. Park, S. D. Tilley, H. J. Fan and M. Grätzel, *Science*, 2014, **345**, 1593–1596.
8. J. Shi, J. Hu, Y. Luo, X. Sun and A. M. Asiri, *Catal. Sci. Technol.*, 2015, **5**, 4954–4958.
9. Luo, Q., Peng, M., Sun, X., and Luo, Y. & Asiri, A. M., *Int. J. Hydrogen Energy*, 2016, **41**, 8785–8792.
10. A. Han, H. Zhang, R. Yuan, H. Ji and P. Du, *ACS Appl. Mater. Interfaces*, 2017, **9**, 2240–2248.
11. H. Hu, B. Guan, B. Xia and X. Lou, *J. Am. Chem. Soc.*, 2015, **137**, 5590–5595.
12. F. Song and X. Hu, *Nat. Commun.*, 2014, **5**, 4477.
13. Y. Zheng, M. Gao, Q. Gao, H. Li, J. Xu, Z. Wu and S. Yu, *Small*, 2015, **11**, 182–188.
14. R. Zhang, C. Tang, R. Kong, G. Du, A.M. Asire, L. Chen and X. Sun, *Nanoscale*, 2017, **9**, 4793–4800
15. N. Cheng, Y. Xue, Q. Liu, J. Tian, L. Zhang, A.M. Asiri and X. Sun, *Electrochim. Acta.*, 2015, **163**, 102–106.
16. R. Ge, X. Ren, X. Ji, Z. Liu, G. Du, A. M. Asiri, X. Sun and L. Chen, *ChemSusChem*, 2017, **10**, 4004–4008.
17. S. Hao, L. Yang, D. Liu, R. Kong, G. Du, A. M. Asiri, Y. Yang and X. Sun, *Chem. Commun.*, 2017, **53**, 5710–5713.
18. J. Shi, J. Hu, Y. Luo, X. Sun and A. M. Asiri, *Catal. Sci. Technol.*, 2015, **5**, 4954–4958.
19. Y. Liang, Y. Li, H. Wang, J. Zhou, J. Wang, T. Regier and H. Dai, *Nat. Mater.*, 2011, **10**, 780–786.
20. X. Li, Y. Fang, X. Lin, M. Tian, X. An, Y. Fu, R. Li, J. Jin and J. Ma, *J. Mater. Chem. A*, 2015, **3**, 17392–17402.
